# Supplementary material for: Carboxylated polyimide separator with excellent lithium ion transport properties for a high-power density lithium-ion battery
Source: Royal Society of Chemistry journal article supplement (doi:10.1039/c7ta08702k), 2017-12-05
Supplement: c7ta08702k1.pdf [file c7ta08702k1.pdf]

## Supplementary Information

### **Carboxylated polyimide separator with excellent lithium ion transport properties for high-power densities lithium-ion battery**

Chun-Er Lin,<sup>‡a</sup> Hong Zhang,<sup>‡b</sup> You-Zhi Song,<sup>a</sup> Yin Zhang,<sup>a</sup> Jia-Jia Yuan,<sup>a</sup> Bao-Ku Zhu<sup>\*a</sup>

a. Key Laboratory of Macromolecule Synthesis and Functionalization (MOE), ERC of Membrane and Water Treatment (MOE), Department of Polymer Science and Engineering, Zhejiang University, Hangzhou 310027, China.

b. Key laboratory for Polymeric Composite and Functional Materials of Ministry of Education, Key Laboratory of High Performance Polymer-Based Composites of Guangdong Province, Sun Yat-sen University, Guangzhou 510275, China.

**\* Address for Correspondence:**

Prof. Bao-Ku Zhu

Department of Polymer Science and Engineering

Zhejiang University

Hangzhou 310027 China

Tel: +86-571-87953723

E-mail: [zhubk@zju.edu.cn](mailto:zhubk@zju.edu.cn)

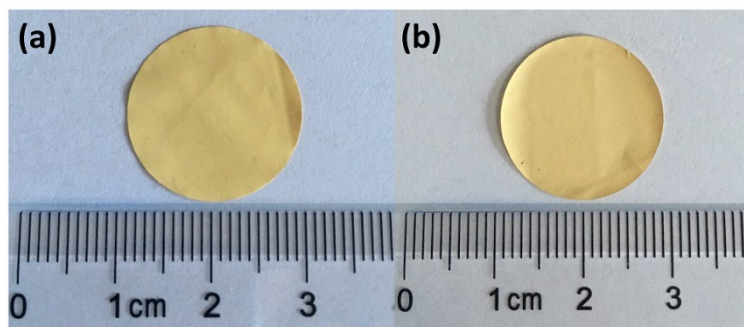

Figure S1. Optical photographs of (a) PI-0 separator and (b) PI-3 separator.

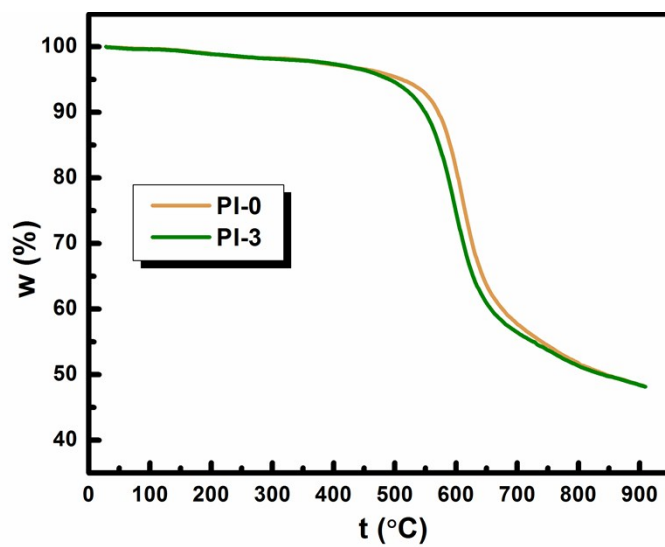

Figure S2. TGA of PI-0 and PI-3 separators

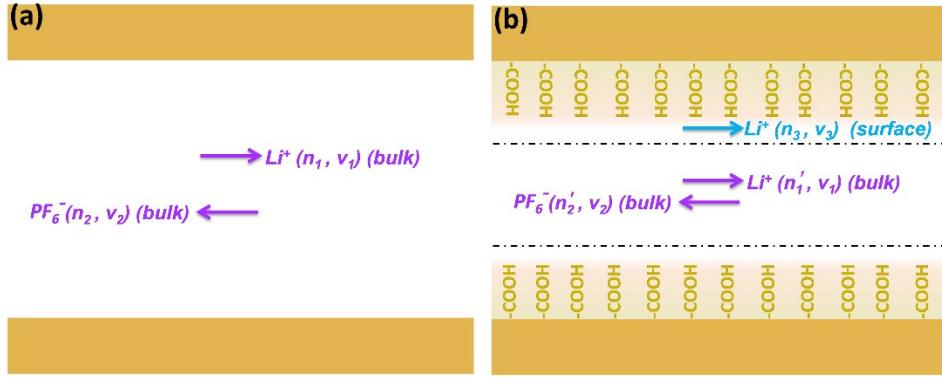

Figure S3. The calculation model of lithium ion transport rate across (a) PI separator,  
(b) PI-COOH separator.

According to Newman's equations<sup>1</sup> which describes mass transport, ion gradients, and potential drops in the electrolyte, the relationship between the ion transport rate and ion conductivity can be concluded from the following equations:

$$i = nqsv \quad (1)$$

$$i \propto \sigma \quad (2)$$

where the  $i$  is current density,  $n$  is the ion concentration,  $q$  is the electron charge,  $s$  is the pore area,  $v$  is the ion transport rate and  $\sigma$  is the ion conductivity. Thus, for the PI-0 separator (Figure S3(a)), the following equation can be inferred:

$$n_1v_1 + n_2v_2 = k\sigma_1 \quad (3)$$

where the  $n_1$  and  $n_2$  are respectively the lithium ion concentration and hexafluorophosphate ion concentration,  $v_1$  and  $v_2$  are respectively lithium ion transport rate and hexafluorophosphate ion transport rate,  $\sigma_1$  is the ion conductivity of the PI-0 separator and  $k$  is a constant related with the  $q$ ,  $s$  and electric field intensity. In addition, the relation between the ion transport rate and transference number can be described by:

---

$$\frac{n_1 v_1}{n_1 v_1 + n_2 v_2} = t_1 \quad (4)$$

where  $t_1$  is the transference number of the PI separator. Thus, the result can be obtained:

$$v_1 = 0.39k$$

$$v_2 = 1.76k$$

For the PI-COOH separator (PI-1 separator as representative) (Figure S3(b)), the similar equation can also be given by:

$$n_1' v_1 + n_2' v_2 + n_3 v_3 = k \sigma_2 \quad (5)$$

$$\frac{n_1' v_1 + n_3 v_3}{n_1' v_1 + n_2' v_2 + n_3 v_3} = t_2 \quad (6)$$

where  $n_1'$  and  $n_2'$  is respectively the lithium ion concentration and bulk hexafluorophosphate ion concentration in the PI-1 separator in the pore (slow transport channel),  $n_3$  is the lithium ion concentration on the surface of the PI-1 separator (fast transport channel),  $v_3$  is the transport rate of lithium ion on the surface of the PI-1 separator,  $\sigma_2$  is the ion conductivity of the PI-1 separator and  $t_2$  is the transference number of the PI-1 separator. Thus, the result can be obtained:

$$v_3 = 2.43k$$

Similarly, the results for the other PI-COOH separator can also be obtained:

$$v_4 = 2.49k$$

$$v_5 = 2.58k$$

where  $v_4$  and  $v_5$  are the lithium ion transport rates on the surface of the PI-2 and PI-3, respectively.

---

## References

1. M. Doyle, T. F. Fuller and J. Newman, *Journal of the Electrochemical Society*, 1993, 140, 1526-1533.
